# Supplementary material for: Effectiveness of a Brief Self-determination Theory–Based Smoking Cessation Intervention for Smokers at Emergency Departments in Hong Kong: A Randomized Clinical Trial
Source: PubMed Central journal article supplement (PMC6902195; doi:10.1001/jamainternmed.2019.5176), 2019-12-02
Supplement: jamainternmed-180-206-s003.pdf [file jamainternmed-180-206-s003.pdf]

## Data Sharing Statement

Li. Effectiveness of a Brief Self-determination Theory-Based Smoking Cessation Intervention for Smokers at Emergency Departments in Hong Kong. *JAMA Intern Med*. Published December 02, 2019. 10.1001/jamainternmed.2019.5176

### Data

**Data available:** No

### Additional Information

**Explanation for why data not available:** All data are belong to the funder (Food and Health Bureau, Hong Kong SAR). The data can be accessed only with the permission by the Bureau
